# Supplementary material
Source: MDPI journal article supplement (https://www.mdpi.com/2077-0472/9/1/7)
Supplement: s1 [file s1]

**Table S1.** Results of synergist bioassays with PBO, DEM and TPP against  $\lambda$ -cyhalothrin.

| Treatment                    | <i>n</i> | % Mortality<br>± S.E.M. | LD <sub>50</sub> (ppm)± S.E.M. | FL (95%)        | SR      | $\chi^2$ | <i>p</i> value |
|------------------------------|----------|-------------------------|--------------------------------|-----------------|---------|----------|----------------|
| $\lambda$ -cyhalothrin       | 54       | 18.52* ± 2.0            | 7461.47 ± 1213.79              | 5082.47–9840.89 | -       | -        | -              |
| PBO + $\lambda$ -cyhalothrin | 36       | 90.6* ± 5.10            | 0.915 ± 0.15                   | 0.82–1.34       | 8154.34 | 98.35    | <0.0001        |
| DEM+ $\lambda$ -cyhalothrin  | 36       | 16.67 ± 6.41            | 277.70 ± 58.72                 | 162.61–392.79   | 26.87   | 0.89     | = 0.35         |
| TPP + $\lambda$ -cyhalothrin | 36       | 19.44 ± 4.81            | 365.07 ± 130.75                | 108.81–621.34   | 20.44   | 0.03     | = 0.86         |
| Control                      | 27       | 0.00 ± 0.00             | -                              | -               | -       | -        | -              |

Results are means ± standard error of mean (S.E.M.) of three replicates each of 9 larvae for each exposure concentration. Synergistic ratio (SR) = ratio of the LD<sub>50</sub> of  $\lambda$ -cyhalothrin exposure in the conventional bioassay to the LD<sub>50</sub> of synergist +  $\lambda$ -cyhalothrin. \* significantly different from  $\lambda$ -cyhalothrin exposure alone in two-sided  $\chi^2$  test of significance ( $\chi^2 = 98.35$ ,  $p < 0.0001$ ).

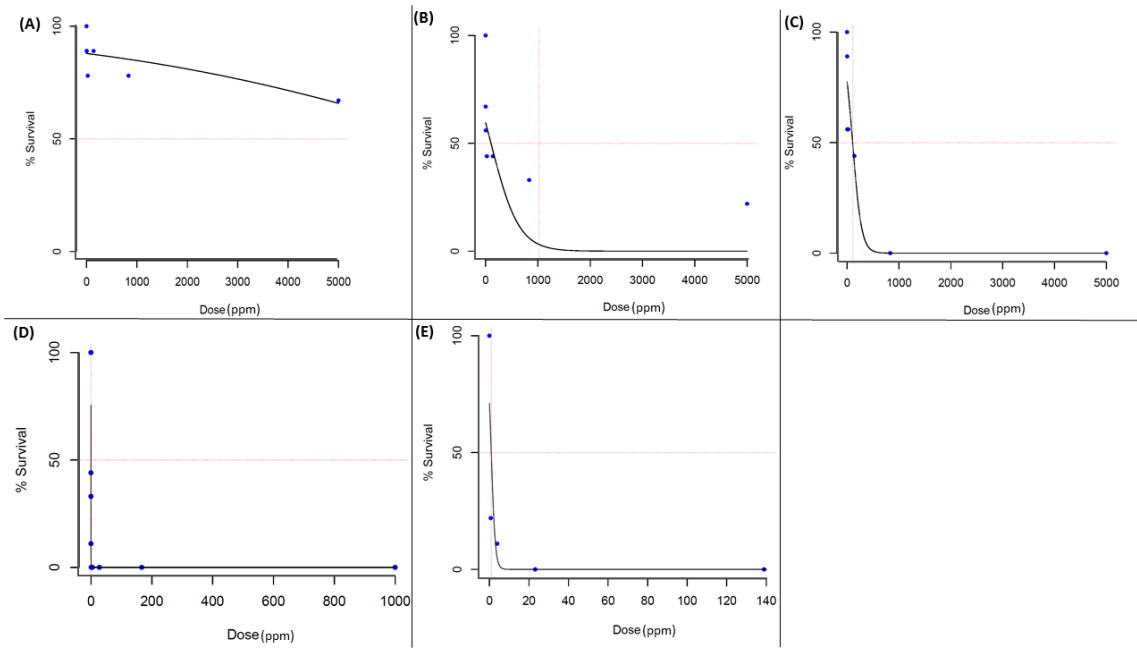

**Figure S1.** Results of dose-response bioassay to establish the LD<sub>50</sub> for *T. absoluta* L2 larvae with (A)  $\lambda$ -cyhalothrin, (B) propoxur, (C) chlorpyrifos-methyl, (D) abamectin, and (E) PBO pre-exposure with  $\lambda$ -cyhalothrin.
